# Supplementary material for: The N-terminal autoinhibitory module of the A1 domain in von Willebrand factor stabilizes the mechanosensor catch bond
Source: Royal Society of Chemistry journal article supplement (doi:10.1039/d2cb00010e), 2022-01-01

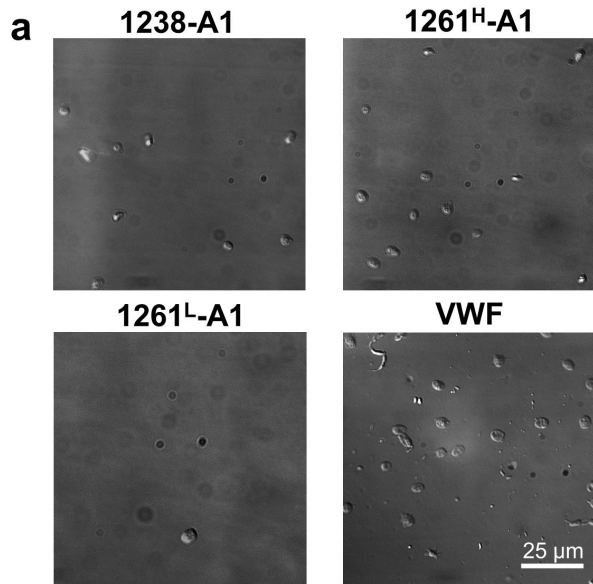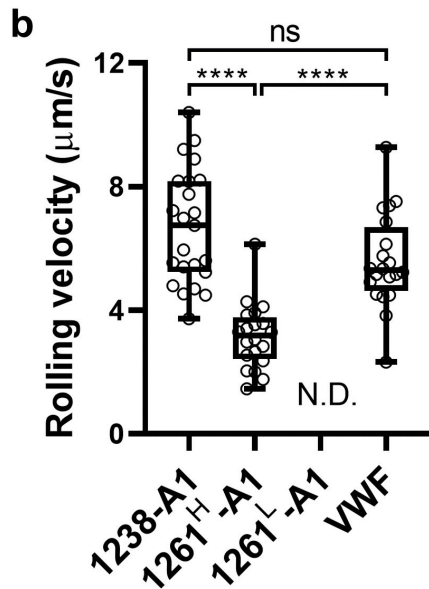

Supplement: d2cb00010e1.pdf [file d2cb00010e1.pdf]
