# Supplementary material for: The N-terminal autoinhibitory module of the A1 domain in von Willebrand factor stabilizes the mechanosensor catch bond
Source: Royal Society of Chemistry journal article supplement (doi:10.1039/d2cb00010e), 2022-01-01
Supplement: d2cb00010e3.pdf [file d2cb00010e3.pdf]

## Supplementary Information

### Title: N-terminal Autoinhibitory Module of A1 Domain in von Willebrand Factor Stabilizes the Mechanosensor Catch Bond

#### Authors and Affiliations:

Yunduo Charles Zhao<sup>1,2†</sup>, Haoqing Wang<sup>1,3</sup>, Yao Wang<sup>1,4</sup>, Jizhong Lou<sup>5,6,7</sup>, Lining Arnold Ju<sup>1,2,3,8†\*</sup>,

<sup>1</sup>*School of Biomedical Engineering, Faculty of Engineering, The University of Sydney, NSW, Australia.*

<sup>2</sup>*Charles Perkins Centre, The University of Sydney, NSW Australia*

<sup>3</sup>*Heart Research Institute, NSW, Australia*

<sup>4</sup>*Cellular and Genetic Medicine Unit, School of Medical Sciences, University of New South Wales, NSW, Australia*

<sup>5</sup>*Key Laboratory of RNA Biology, CAS Center for Excellence in Biomacromolecules, Institute of Biophysics, Chinese Academy of Sciences, Beijing, China*

<sup>6</sup>*University of Chinese Academy of Sciences, Beijing, China*

<sup>7</sup>*Bioland Laboratory (Guangzhou Regenerative Medicine and Health Guangdong Laboratory), Guangzhou, Guangdong, China*

<sup>8</sup>*Coulter Department of Biomedical Engineering, Georgia Institute of Technology, Atlanta, GA, United States*

†*These authors contribute equally.*

\**Corresponding author:*

*Lining Arnold Ju. Email: [Arnold.ju@sydney.edu.au](mailto:Arnold.ju@sydney.edu.au)*

**Figure S1~S2**

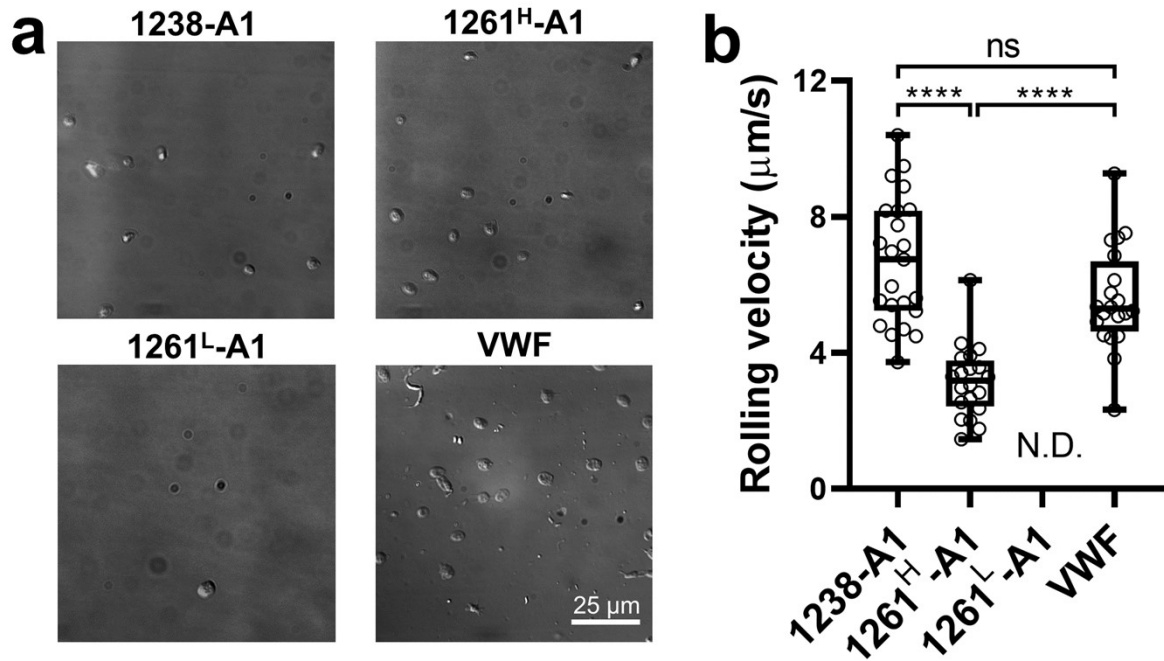

**Figure S1. Platelet tethering on the surface of flow chamber coated with VWF-A1 variants or full-length VWF.** a) Representative snapshots of tethered platelets (bright white objects) in a microfluidic channel, at fixed wall shear rate  $\gamma = 800 \text{ s}^{-1}$ , pre-coated with 1238-A1, 1261<sup>H</sup>-A1, 1261<sup>L</sup>-A1 or full-length plasma VWF. The photomicrographs depict the platelets tethered and were rolling on the surface during perfusion and each represents experiments with two different platelet donors. b) Platelets rolling velocity ( $n \geq 20$ ) during perfusion. Data were presented as box plots. N.D. = not detectable. \*\*\*\* =  $p < 0.0001$ ; ns = not significant, assessed by unpaired, two-tailed Student's *t*-test.

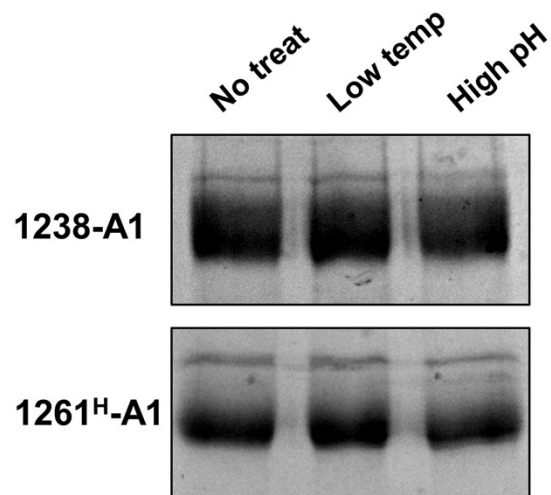

**Figure S2.** 1238-A1 and 1261<sup>H</sup>-A1 with indicated environmental factors were analyzed under reducing condition by SDS-PAGE (12.5%) and Coomassie Blue staining.
